# Supplementary material for: Prediction of unconventional protein secretion by exosomes
Source: PubMed Central journal article supplement (PMC8210391; doi:10.1186/s12859-021-04219-z), 2021-06-16

- Exosome vs Exosome
- Non-exosome vs Non-exosome
- Exosome vs Non-exosome
- All vs All

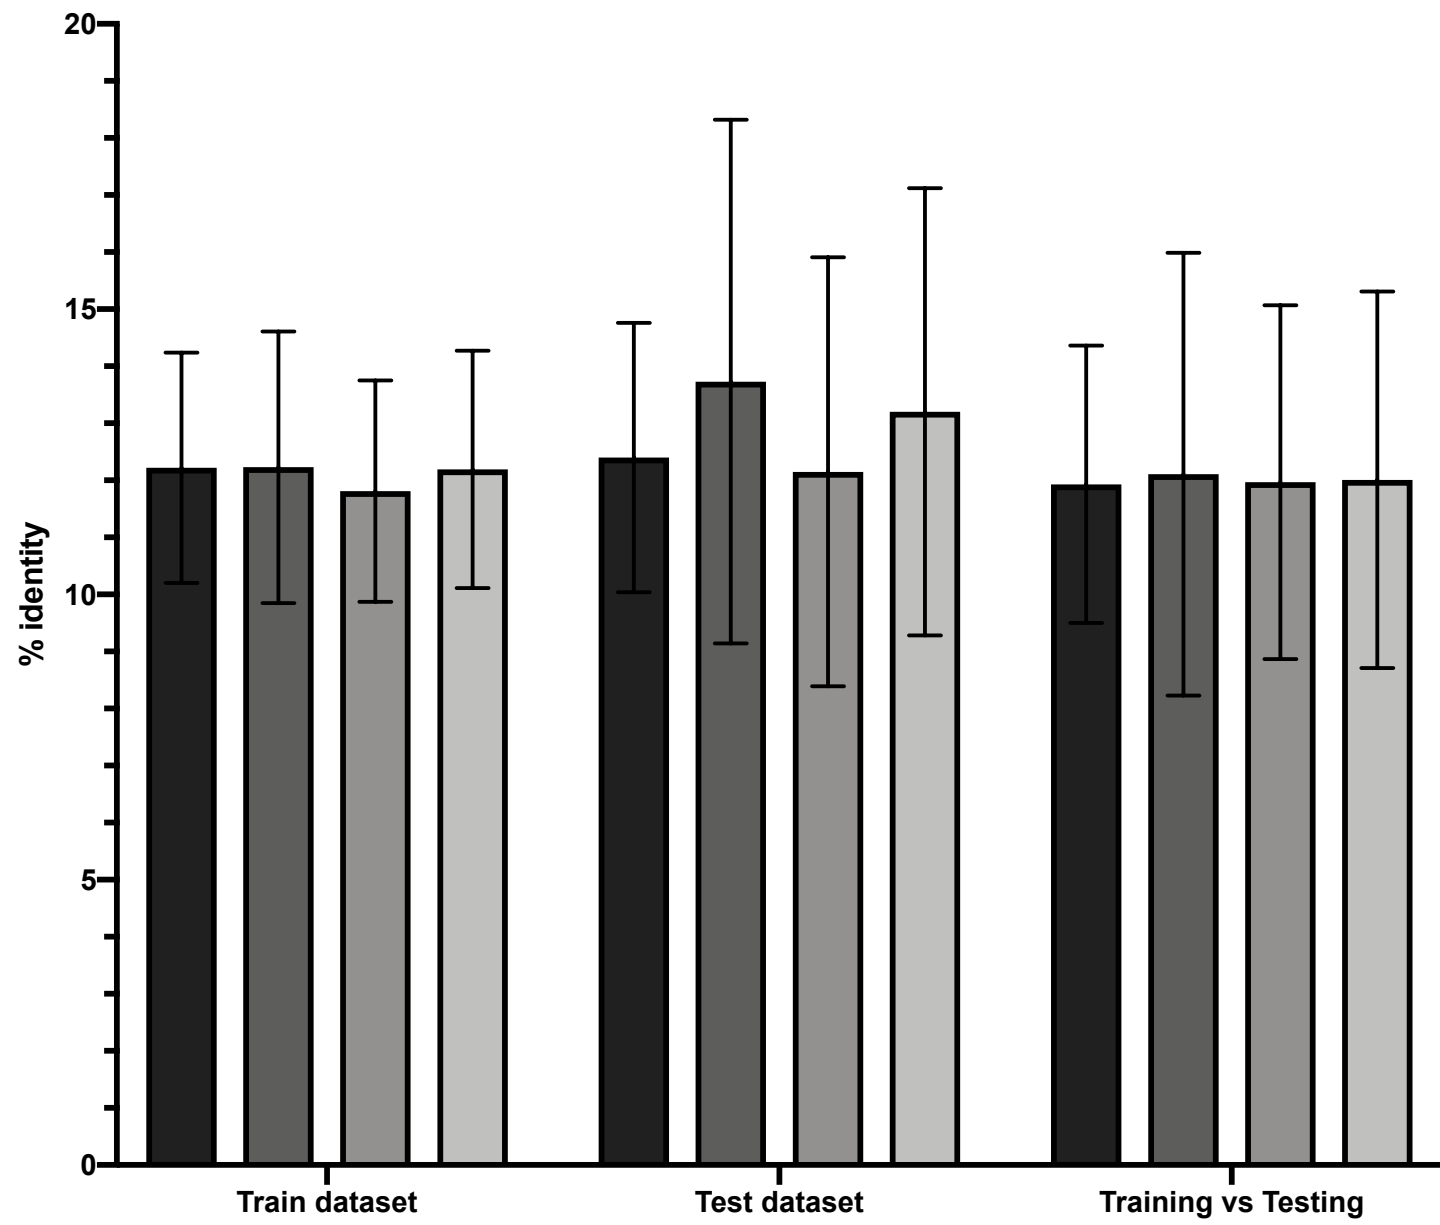

Supplement: 12859_2021_4219_MOESM1_ESM.pdf [file 12859_2021_4219_MOESM1_ESM.pdf]
